# Supplementary material
Source: PubMed Central journal article supplement (PMC3776254)
Supplement: 125_2013_2854_MOESM1_ESM.pdf [file 125_2013_2854_MOESM1_ESM.pdf]

ESM Table 1. Baseline characteristics of EPIC-Norfolk participants with and without complete data on HbA<sub>1c</sub> at baseline and 2<sup>nd</sup> health examination (n=25,639)

| Characteristic                                              | Total<br>(n = 25,639) | Individuals with<br>complete data on<br>HbA <sub>1c</sub><br>(n = 6,372) | Individuals<br>without complete<br>data on HbA <sub>1c</sub><br>(n = 19,267) | <i>p</i> value <sup>a</sup> |
|-------------------------------------------------------------|-----------------------|--------------------------------------------------------------------------|------------------------------------------------------------------------------|-----------------------------|
| Age, mean (SD), years                                       | 58.7 (9.3)            | 57.8 (9.4)                                                               | 59.1 (9.3)                                                                   | < 0.001                     |
| Enrolment year, n (%)                                       |                       |                                                                          |                                                                              |                             |
| 1993-1994                                                   | 7,444                 | 0 (0)                                                                    | 7,444 (100.0)                                                                | < 0.001                     |
| 1995-1996                                                   | 12,448                | 3,251 (26.1)                                                             | 9,197 (73.9)                                                                 |                             |
| 1997-1998                                                   | 5,747                 | 3,121 (54.3)                                                             | 2,626 (45.7)                                                                 |                             |
| Male sex, n (%)                                             | 2,451 (42.3)          | 2,827 (44.4)                                                             | 8,780 (45.6)                                                                 | < 0.001                     |
| Social class I-IIIa <sup>b</sup> , n (%)                    | 15,051 (60.0)         | 4,037 (64.2)                                                             | 11,014 (58.6)                                                                | <0.001                      |
| Smoking status, n (%)                                       |                       |                                                                          |                                                                              |                             |
| Current smokers                                             | 2,984 (11.7)          | 576 (9.1)                                                                | 2,408 (12.6)                                                                 | < 0.001                     |
| Former smokers                                              | 10,761 (42.3)         | 2,621 (41.4)                                                             | 8,140 (42.6)                                                                 |                             |
| Non-smokers                                                 | 11,674 (45.9)         | 3,131 (49.5)                                                             | 8,543 (44.8)                                                                 |                             |
| Family history of CVD,<br>n (%)                             | 13,002 (50.7)         | 3,363 (52.8)                                                             | 9,639 (50.0)                                                                 | < 0.001                     |
| BMI, mean (SD), kg/m <sup>2</sup>                           | 26.4 (3.9)            | 26.0 (3.8)                                                               | 26.5 (4.0)                                                                   | < 0.001                     |
| Systolic blood pressure,<br>mean (SD), mm Hg                | 135.5 (18.5)          | 134.1 (17.7)                                                             | 135.9 (18.7)                                                                 | < 0.001                     |
| Total cholesterol,<br>mean (SD), mmol/l                     | 6.2 (1.2)             | 6.1 (1.1)                                                                | 6.2 (1.2)                                                                    | < 0.001                     |
| HDL-cholesterol,<br>mean (SD), mmol/l                       | 1.4 (0.4)             | 1.5 (0.4)                                                                | 1.4 (0.4)                                                                    | < 0.001                     |
| Triacylglycerol,<br>median (interquartile range),<br>mmol/l | 1.5 (1.1-2.2)         | 1.5 (1.0 - 2.2)                                                          | 1.6 (1.1 - 2.3)                                                              | < 0.001                     |
| Use of antihypertensive<br>drugs, n (%)                     | 4,808 (18.8)          | 991 (15.6)                                                               | 3,817 (19.8)                                                                 | < 0.001                     |
| Use of lipid-lowering drugs,<br>n (%)                       | 382 (1.5)             | 106 (1.7)                                                                | 276 (1.4)                                                                    | < 0.001                     |

<sup>a</sup> *p* values represent the difference between individuals with and without complete data on HbA<sub>1c</sub> at baseline and 2<sup>nd</sup> health examination using *t* tests or Kruskal–Wallis tests for normally or non-normally distributed continuous variables and  $\chi^2$  tests for categorical variables.

<sup>b</sup> Registrar General's Social Class: class I, professional, etc. occupations; class II, managerial and technical occupations; class IIIa, skilled occupations (nonmanual); class IIIb, skilled occupations (manual); class IV, partly skilled occupations; class V, unskilled occupations; the numbers do not add up to the total due to 570 individuals with missing data for this variable.
