# Supplementary material
Source: PubMed Central journal article supplement (PMC3776254)
Supplement: 125_2013_2854_MOESM2_ESM.pdf [file 125_2013_2854_MOESM2_ESM.pdf]

ESM Table 2. Relative risk (hazard ratio) estimated from multivariable Cox regression for the association between risk factors and development of a first cardiovascular event over 8 years

| Risk factors                                                                | Hazard ratio (95%CI) |                      |                      |                      |                      |
|-----------------------------------------------------------------------------|----------------------|----------------------|----------------------|----------------------|----------------------|
|                                                                             | Model 1 <sup>a</sup> | Model 2 <sup>a</sup> | Model 3 <sup>a</sup> | Model 4 <sup>a</sup> | Model 5 <sup>a</sup> |
| Change in HbA <sub>1c</sub> over 3 years (every 1-SD change)                | 1.14 (1.06,1.22)*    | -                    | 1.10 (1.01,1.19)*    | -                    | 1.00 (0.92,1.09)     |
| Baseline HbA <sub>1c</sub> (every 1.0% higher)                              | 1.71 (1.51,1.95)*    | 1.08 (0.94,1.24)     | 1.19 (1.01,1.39)*    | -                    | -                    |
| HbA <sub>1c</sub> at 2 <sup>nd</sup> health examination (every 1.0% higher) | -                    | -                    | -                    | 1.19 (1.04,1.36)*    | 1.19 (1.01,1.39)*    |
| Female sex                                                                  | -                    | 0.48 (0.40,0.58)*    | 0.48 (0.40,0.58)*    | 0.48 (0.40,0.58)*    | 0.48 (0.40,0.58)*    |
| Age (every 1 year older)                                                    | -                    | 1.09 (1.08,1.10)*    | 1.09 (1.08,1.10)*    | 1.09 (1.08,1.10)*    | 1.09 (1.08,1.10)*    |
| Current smokers                                                             | -                    | 1.55 (1.17,2.06)*    | 1.55 (1.17,2.06)*    | 1.55 (1.17,2.06)*    | 1.55 (1.17,2.06)*    |
| Total cholesterol (every 1 mmol/l higher)                                   | -                    | 1.11 (1.03,1.20)*    | 1.11 (1.03,1.20)*    | 1.11 (1.03,1.20)*    | 1.11 (1.03,1.20)*    |
| Systolic blood pressure (every 1 mmHg higher)                               | -                    | 1.01 (1.00,1.01)*    | 1.01 (1.00,1.01)*    | 1.01 (1.00,1.01)*    | 1.01 (1.00,1.01)*    |
| Family history of CVD                                                       | -                    | 1.20 (1.01,1.44)*    | 1.20 (1.01,1.44)*    | 1.20 (1.01,1.44)*    | 1.20 (1.01,1.44)*    |
| Use of lipid lowering drugs                                                 | -                    | 2.25 (1.62,3.12)*    | 2.25 (1.62,3.12)*    | 2.25 (1.62,3.12)*    | 2.25 (1.62,3.12)*    |
| aROC (95%CI) <sup>b</sup>                                                   | 0.60 (0.58,0.63)     | 0.78 (0.76,0.80)     | 0.78 (0.76,0.80)     | 0.78 (0.76,0.80)     | 0.78 (0.76,0.80)     |

<sup>a</sup> Hazard ratios were adjusted for all variables in the table and the results were not changed after adjustment for body mass index at baseline, changes in systolic blood pressure, total cholesterol, HDL-cholesterol and body mass index over time, Abbreviation: SD= standard deviation, aROC = area under the receiver operating characteristic curve, <sup>b</sup> *p* values for comparing aROC: *p*<0.001 Model 1 vs Model 3; *p*=0.702 Model 2 vs Model 3; *p*=0.987 Model 4 vs Model 5

\* *p*<0.05
